# Supplementary material for: Large-scale and patternable graphene: direct transformation of amorphous carbon film into graphene/graphite on insulators via Cu mediation engineering and its application to all-carbon based devices
Source: Royal Society of Chemistry journal article supplement (doi:10.1039/c4nr04627g), 2014-10-13
Supplement: c4nr04627g1.pdf [file c4nr04627g1.pdf]

## Supplementary Information

### Large-Scale and Patternable Graphene: Direct Transformation of Amorphous Carbon Film into Graphene/Graphite on Insulators via Cu mediation engineering and its Application on All-Carbon based Device

*Yu-Ze Chen, Henry Medina, Hung-Wei Tsai, Teng-Yu Su, Hung-Chiao Lin, and Yu-Lun Chueh\**

*<sup>†</sup>Department of Materials Science and Engineering, National Tsing Hua University, Hsinchu, 30013, Taiwan.*

\* E-mail: ylchueh@mx.nthu.edu.tw

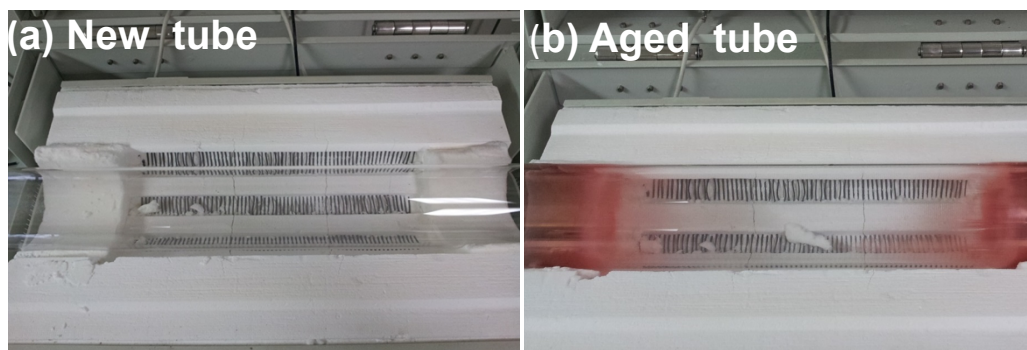

Figure S1 Optical images of (a) a new tube and (b) an aged tube after annealing of Cu foil at 1050 °C for 2 h.

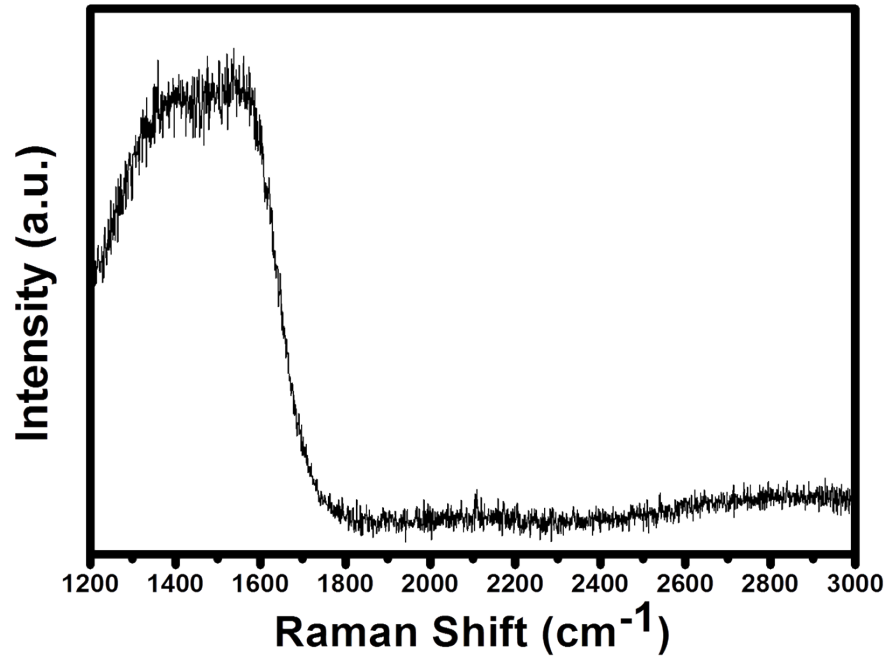

Figure S2 Raman spectrum of the as-deposited a-C film.

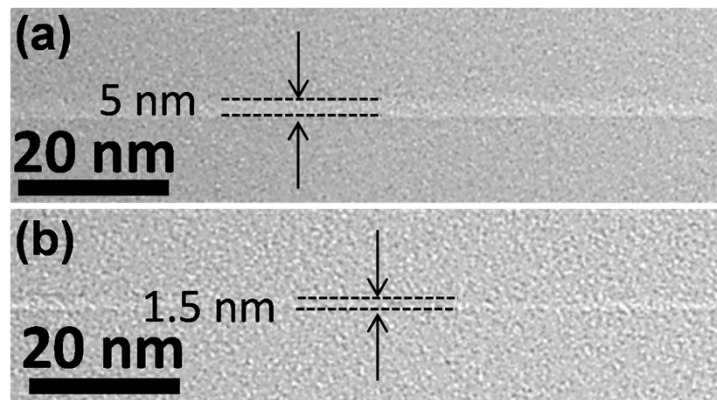

Figure S3 High resolution TEM iamges of (a) 5 nm-thick pre-deposited a-C layer before annealing and (b) after annealing at a temperature at 1000 °C.

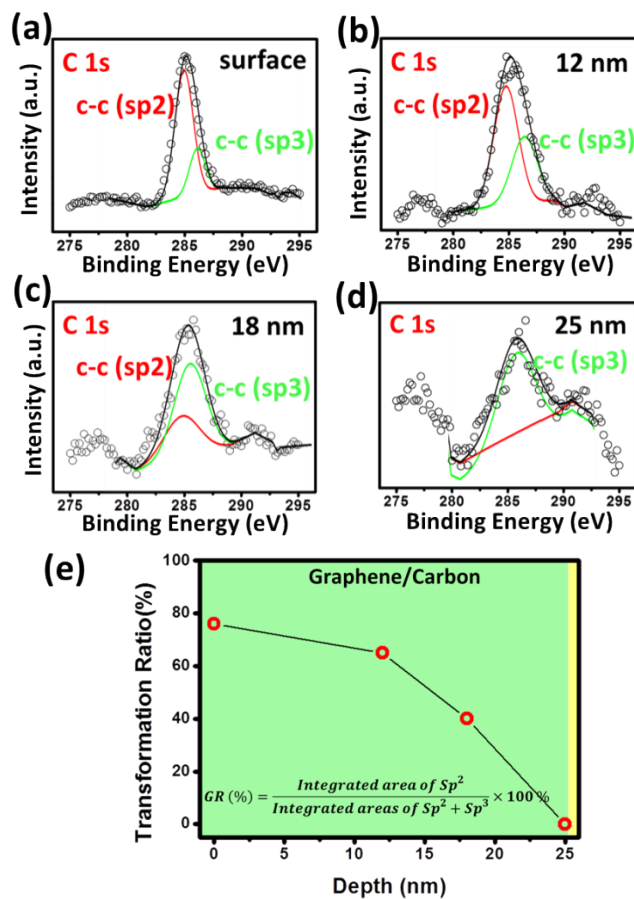

Figure S4 (a-d) XPS depth profile of 25 nm pre-deposited amorphous carbon after annealing in the presence of Cu vapor. (e) The transformation ratio dependence with depth below surface.

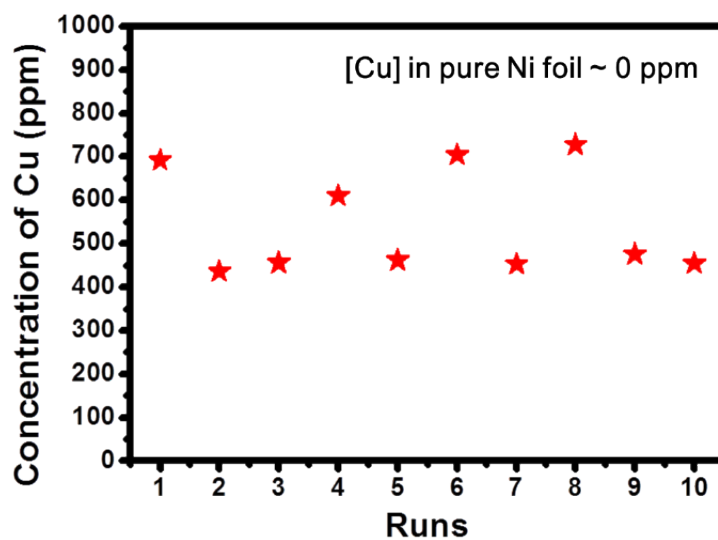

Figure S5 ICP-MS results of Cu gaseous molecules captured by Ni foil at 1020 °C.

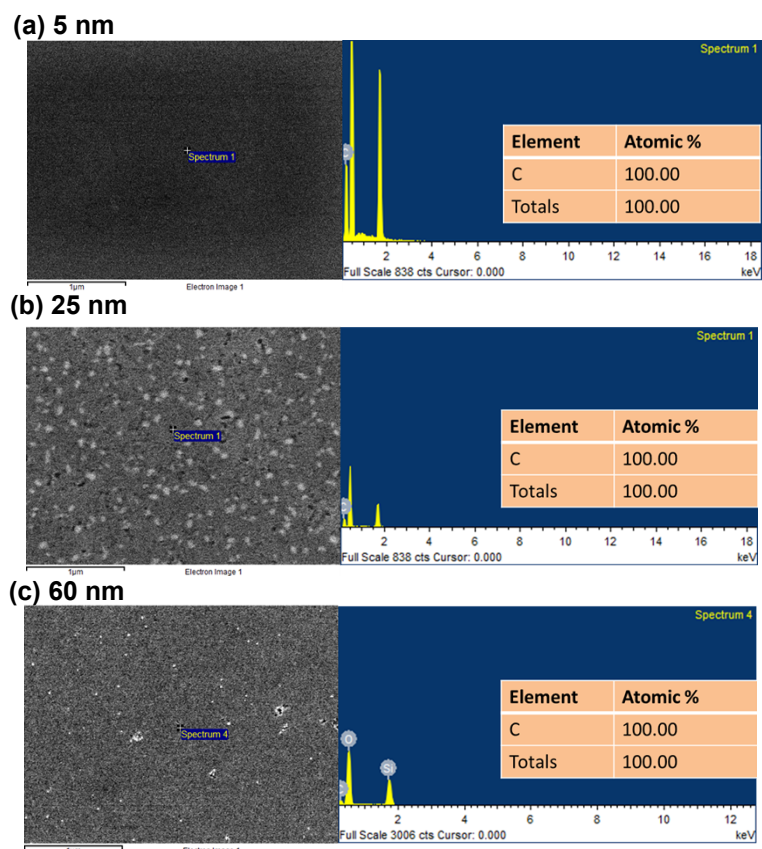

Figure S6 SEM-EDX of samples with (a) 5 nm, (b) 25 nm, and (c) 60 nm-thick pre-deposited a-C films.

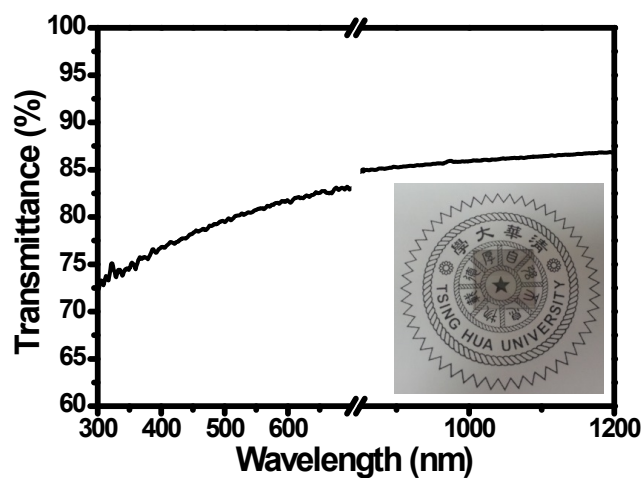

Figure S7 UV-Vis spectrum of graphene transformed directly on quartz
